# Supplementary material for: Significance of 5-S-Cysteinyldopa as a Marker for Melanoma
Source: PubMed Central journal article supplement (PMC7013534; doi:10.3390/ijms21020432), 2020-01-09
Supplement: ijms-21-00432-s001.pdf [file ijms-21-00432-s001.pdf]

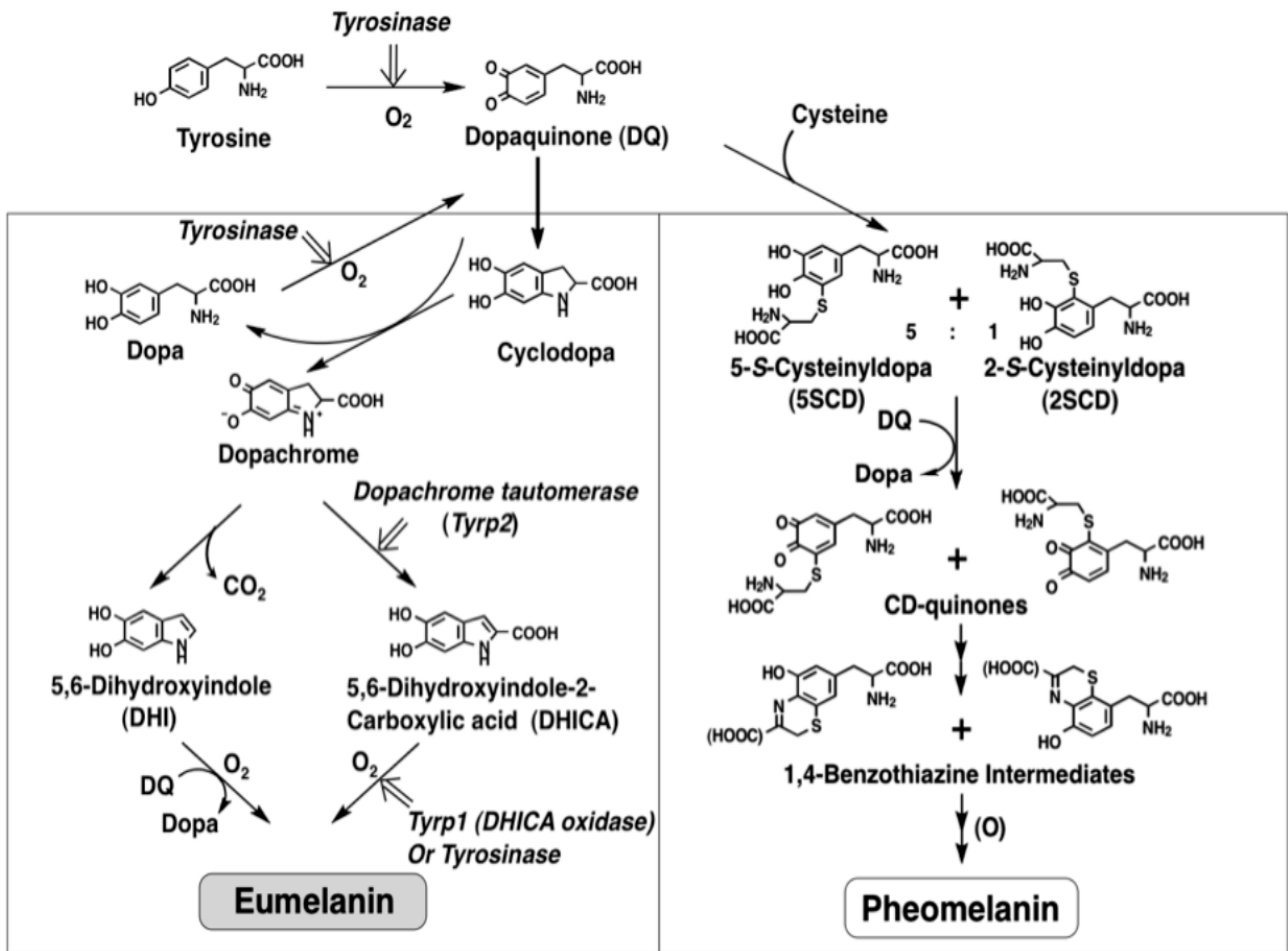

Supplemental Figure S1. Biosynthesis pathway of eumelanin and pheomelanin.

**Supplemental Table S1. Serum and urinary biomarkers for melanoma.**

| <b>Biomarker</b>                                                                | <b>Functions</b>                                                            | <b>References</b> |
|---------------------------------------------------------------------------------|-----------------------------------------------------------------------------|-------------------|
| VEGF (Vascular endothelial growth factor)                                       | VEGF receptor ligand                                                        | 12                |
| FGF                                                                             | FGF receptor ligand                                                         | 13                |
| EGF                                                                             | EGF receptor ligand                                                         | 14                |
| Placental growth factor                                                         | Neuropilin-1 and -2 receptor ligand                                         | 15                |
| TNF                                                                             | G-protein-coupled receptor ligand                                           | 16                |
| IL-8                                                                            | G-protein-coupled receptor ligand                                           | 17                |
| Laminin-5                                                                       | Laminin receptor                                                            | 18                |
| Osteopontin                                                                     | Integrin avb3 ligand                                                        | 19                |
| Tyrosinase                                                                      | Essential enzyme in melanin synthesis                                       | 20                |
| Gp100/pm1-17                                                                    | Melanin synthesis-associated melanosomal matrix glycoprotein                | 21                |
| S100 proteins (S100B)                                                           | Cell division and differentiation-associated acidic calcium-binding protein | 22                |
| Serum amyloid A (SAA)                                                           | A superfamily of acute-phase proteins and proinflammatory adipokine         | 23                |
| C reactive protein (CRP)                                                        | Tumor-associated inflammatory response                                      | 24                |
| MIA                                                                             | A small soluble protein                                                     | 25                |
| L-dopa/L-tyrosine                                                               | Precursors of melanin                                                       | 26                |
| TA-90                                                                           | Potential immunostimulatory or antineoplastic activator                     | 27                |
| Survivin                                                                        | Apoptosis inhibition                                                        | 28                |
| Cytoplasmic/high-molecular-weight melanoma-associated antigen (CYT-MAA/HMW-MAA) | Melanoma progression                                                        | 29                |
| Galectin-3                                                                      | B-galactoside-binding protein                                               | 30                |
| Gangliosides                                                                    | Interactions between melanoma cells                                         | 31                |
| Circulating-tumor DNA (ctDNA)                                                   | DNA methylation pattern                                                     | 32                |
| Micro-RNAs (miR)                                                                | Regulation of gene expression                                               | 33                |
| Long non-coding RNAs                                                            | Regulation of gene expression                                               | 34                |
| IL-1                                                                            | Survival or proliferation-associated factor                                 | 35                |
| IL-4                                                                            | Survival or proliferation-associated factor                                 | 36                |
| IL-6                                                                            | Survival or proliferation-associated factor                                 | 37                |
| IL-10                                                                           | Survival or proliferation-associated factor                                 | 38                |
| IL-12                                                                           | Survival or proliferation-associated factor                                 | 39                |
| YKL-40                                                                          | Survival or proliferation-associated factor                                 | 40                |
| Circulating melanoma cells (CMC)                                                | Cancer cells released by tumor                                              | 41                |
| Lactate dehydrogenase (LDH)                                                     | An indicator for liver metastasis                                           | 42                |
| Glypican-3                                                                      | Survival or proliferation-associated factor                                 | 43                |
| SPARC (Secreted protein acidic and rich in cysteine)                            | Matricellular protein                                                       | 44                |
| PKCa                                                                            | Survival or proliferation-associated factor                                 | 45                |
| 5SCD                                                                            | Precursor of melanin                                                        | 46                |
| 6H5MI2C                                                                         | Precursor of melanin                                                        | 47                |

## Supplemental Table S2. Patient characteristics

|                                 |                       |         |
|---------------------------------|-----------------------|---------|
| Total number of patients        | 218                   |         |
| Sex                             |                       |         |
| Male                            | 112                   | (51.4%) |
| Female                          | 106                   | (48.6%) |
| Age <sup>a</sup>                |                       |         |
| Mean $\pm$ SD                   | 54.8 $\pm$ 15.3 years |         |
| Range                           | 12-88 years           |         |
| Diagnosis                       |                       |         |
| Acral lentiginous melanoma      | 101                   | (46.3%) |
| Nodular melanoma                | 45                    | (20.6%) |
| Superficial spreading melanoma  | 43                    | (19.7%) |
| Lentigo maligna melanoma        | 11                    | (5.0%)  |
| Mucosal melanoma                | 6                     | (2.8%)  |
| Uveal melanoma                  | 3                     | (1.4%)  |
| Unknown                         | 9                     | (4.1%)  |
| Site                            |                       |         |
| Head and neck                   | 19                    | (8.7%)  |
| Trunk                           | 28                    | (12.8%) |
| Leg                             | 30                    | (13.8%) |
| Arm                             | 19                    | (8.7%)  |
| Foot                            | 103                   | (47.2%) |
| Hand                            | 6                     | (2.8%)  |
| Mucous                          | 6                     | (2.8%)  |
| Ocular                          | 3                     | (1.4%)  |
| Unknown                         | 4                     | (1.8%)  |
| Stage                           |                       |         |
| I                               | 25                    | (11.5%) |
| II                              | 63                    | (28.9%) |
| III                             | 112                   | (51.4%) |
| IV                              | 18                    | (8.3%)  |
| Pigment production <sup>b</sup> |                       |         |
| Melanotic                       | 158                   | (72.5%) |
| Amelanotic                      | 12                    | (5.5%)  |
| Unknown                         | 48                    | (22.0%) |

<sup>a</sup>At the initial visit.

<sup>b</sup>In primary lesion.

Adapted from Wakamatsu et al. (46)

## Supplemental Table S3. Frequency of elevated levels of serum 5SCD according to the presence or

**absence of metastasis.**

|                                           | No. | %  |
|-------------------------------------------|-----|----|
| With distant metastasis (n = 62)          |     |    |
| 5SCD all $\leq$ 10 nmol/L                 | 4   | 6  |
| 5SCD once > 10 nmol/L                     | 1   | 2  |
| 5SCD multiple > 10 nmol/L                 | 57  | 92 |
| With recurrence/local metastasis (n = 13) |     |    |
| 5SCD all $\leq$ 10 nmol/L                 | 8   | 62 |
| 5SCD once > 10 nmol/L                     | 4   | 31 |
| 5SCD multiple > 10 nmol/L                 | 1   | 7  |
| Without recurrence/metastasis (n = 143)   |     |    |
| 5SCD all $\leq$ 10 nmol/L                 | 95  | 66 |
| 5SCD once > 10 nmol/L                     | 32  | 22 |
| 5SCD multiple > 10 nmol/L                 | 16  | 11 |

Adapted from Wakamatsu et al. (46)
